# Supplementary material
Source: HighWire-hosted journal article supplement (https://heart.bmj.com/content/106/2/147)
Supplement: inline-supplementary-material-1 [file inline-supplementary-material-1.pdf]

**Supplemental Table 1. Correlation between Echocardiographic Variables and HIV Variables**

|                                   | LV Mass Index (g/m <sup>2</sup> ) |         | LV GLS (%)              |         | LV Ejection Fraction (%) |         |
|-----------------------------------|-----------------------------------|---------|-------------------------|---------|--------------------------|---------|
|                                   | Correlation Coefficient           | p-value | Correlation Coefficient | p-value | Correlation Coefficient  | p-value |
|                                   | <b>Current CD4+ count</b>         | -0.17   | 0.18                    | 0.08    | 0.50                     | 0.16    |
| <b>LN(Nadir CD4+ count)</b>       | -0.06                             | 0.59    | -0.08                   | 0.47    | 0.14                     | 0.18    |
| <b>HIV Duration</b>               | -0.04                             | 0.69    | -0.01                   | 0.93    | -0.03                    | 0.76    |
| <b>ART Duration</b>               | -0.07                             | 0.53    | -0.05                   | 0.62    | -0.04                    | 0.72    |
| <b>Current Protease Inhibitor</b> | -0.09                             | 0.38*   | 0.15                    | 0.14*   | -0.07                    | 0.49*   |

\*p-values derived from Point-Biserial Correlation. All other p-values derived from Pearson Correlation.

ART=antiretroviral treatment; GLS=global longitudinal strain; HIV=Human immunodeficiency virus; LV=left ventricular
